# Supplementary material for: Functional genomics identifies predictive markers and clinically actionable resistance mechanisms to CDK4/6 inhibition in bladder cancer
Source: PubMed Central journal article supplement (PMC6647307; doi:10.1186/s13046-019-1322-9), 2019-07-22

**a**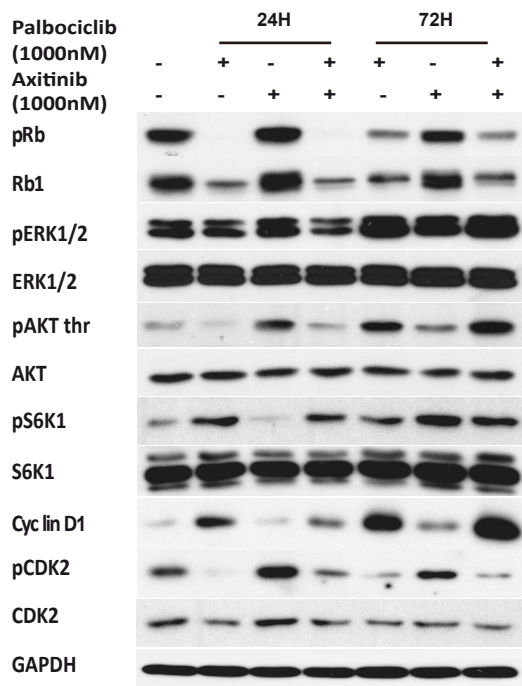**c**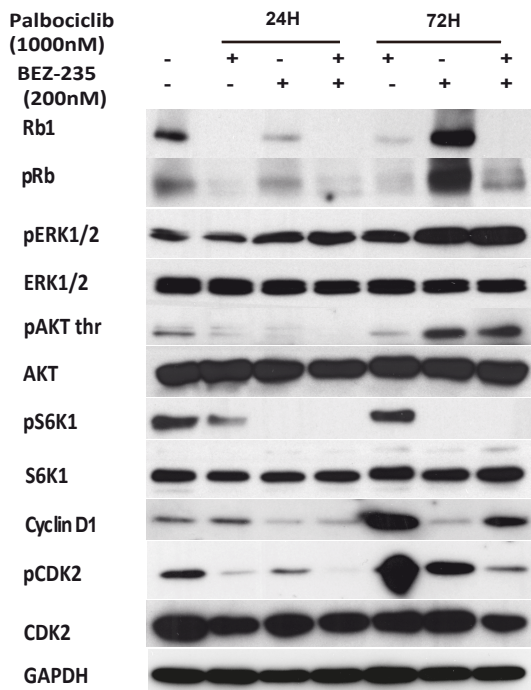**b**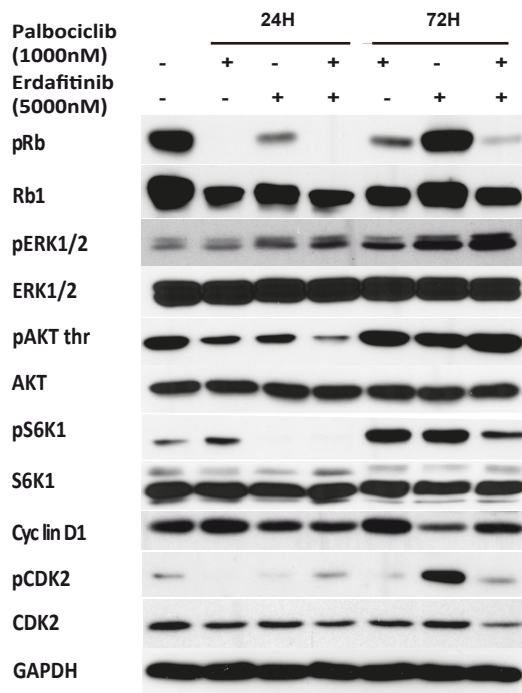**d**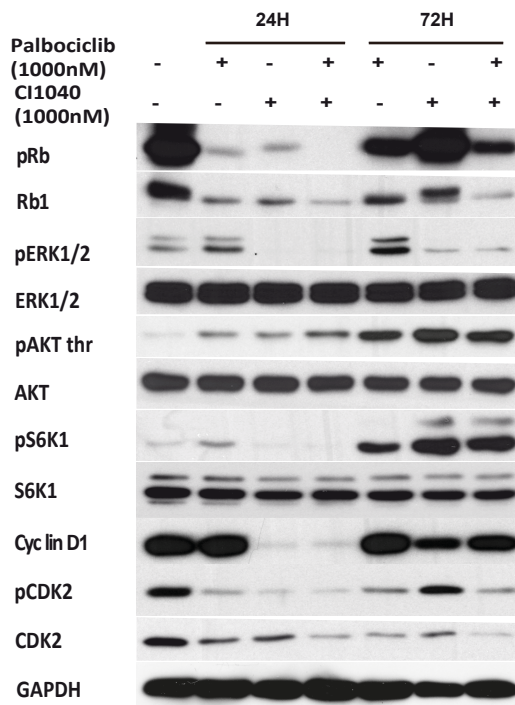

Supplement: 13046_2019_1322_MOESM4_ESM.pdf [file 13046_2019_1322_MOESM4_ESM.pdf]
