# Supplementary material for: Functional genomics identifies predictive markers and clinically actionable resistance mechanisms to CDK4/6 inhibition in bladder cancer
Source: Springer Nature journal article supplement (doi:10.1186/s13046-019-1322-9), 2019-07-22

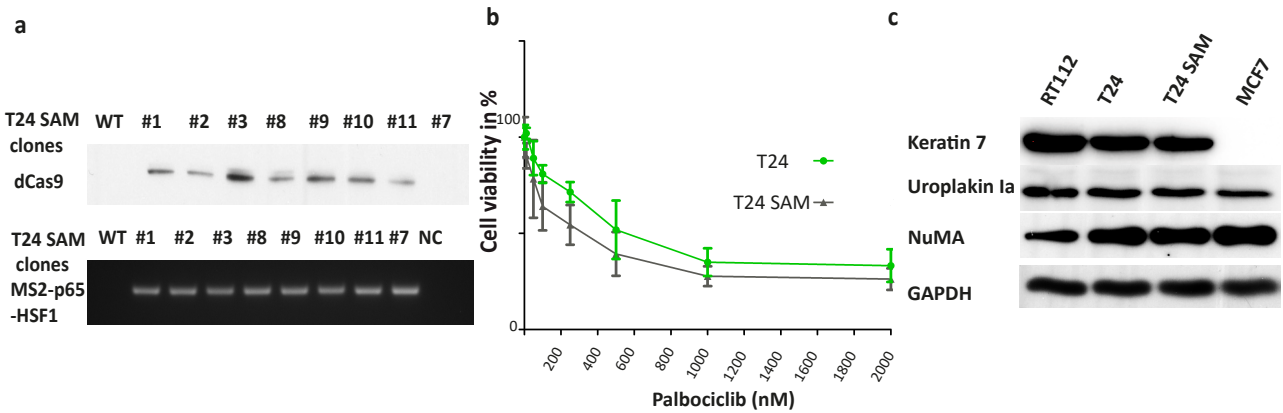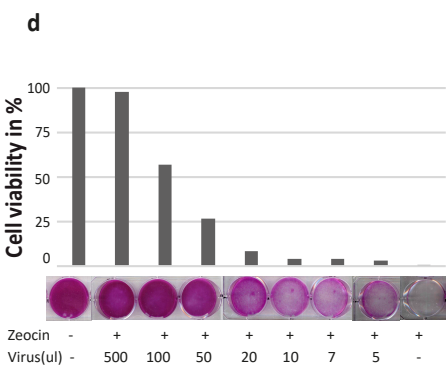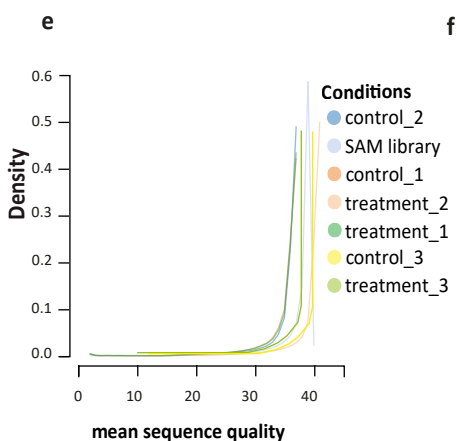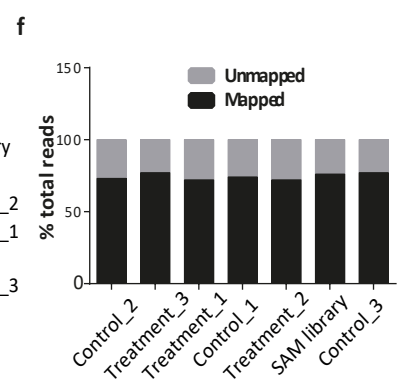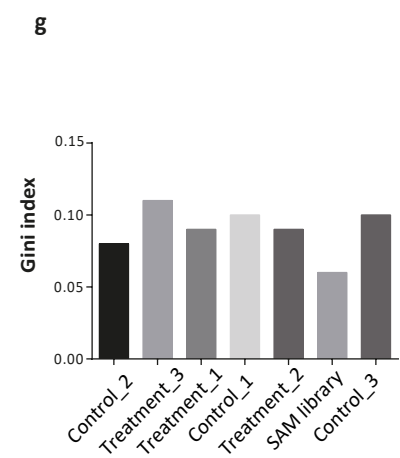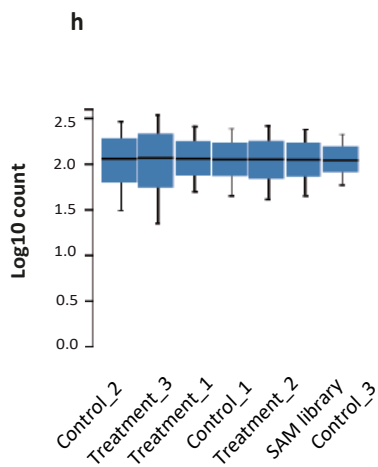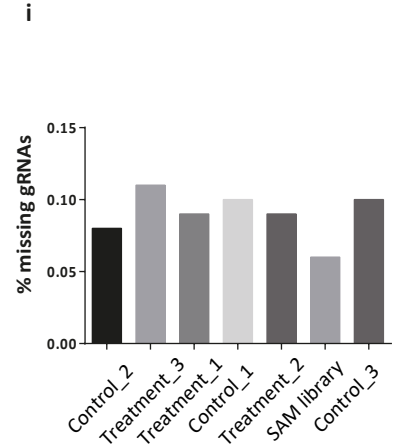

Supplement: MOESM1 [file 16970552]
